# Supplementary material
Source: PubMed Central journal article supplement (PMC3501122)
Supplement: Supp_Fig1.pdf [file Supp_Fig1.pdf]

| Source                | Sum Sq.  | df | Mean Sq. | F      | Prob > F |
|-----------------------|----------|----|----------|--------|----------|
| HA concentration      | 43306.2  | 3  | 14435.4  | 178.03 | 1.33E-28 |
| Time                  | 55500.1  | 6  | 9250     | 114.08 | 1.50E-29 |
| HA concentration*Time | 9792.3   | 18 | 544      | 6.71   | 1.73E-08 |
| Error                 | 4540.6   | 56 | 81.1     |        |          |
| Total                 | 114560.5 | 83 |          |        |          |

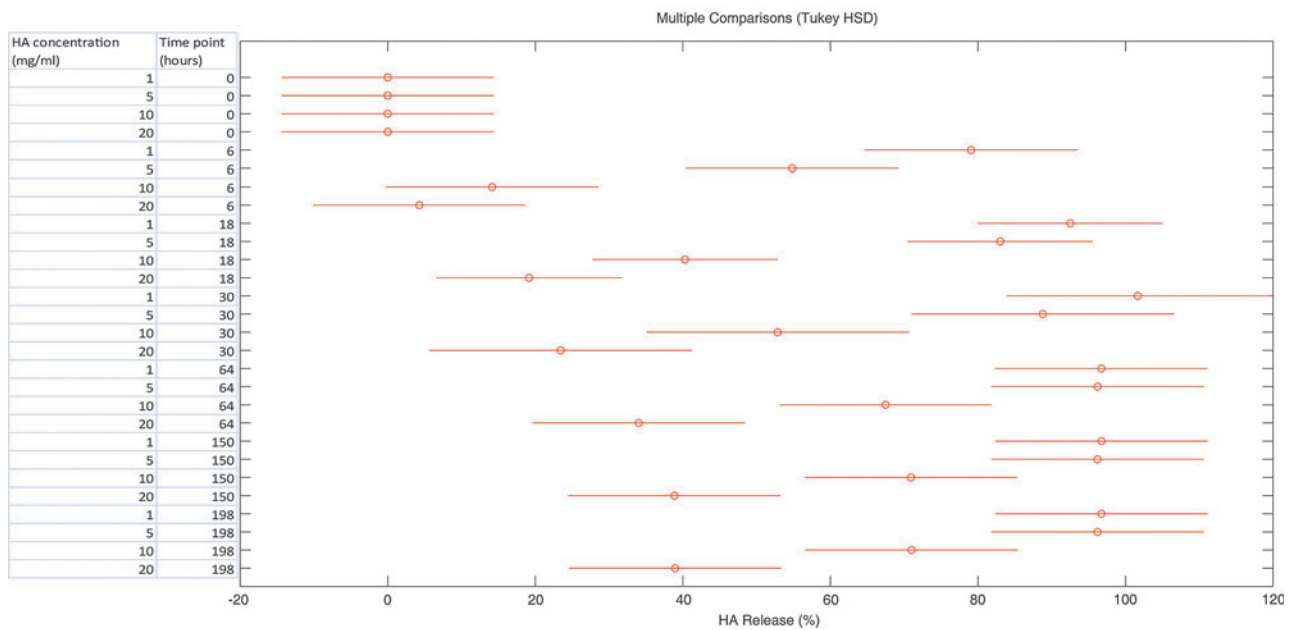

**SUPPLEMENTARY FIG. S1.** Statistical analysis of hyaluronic acid (HA) release. Analysis of variance (ANOVA) *p*-values and multiple comparison test (Tukey HSD) of HA loading-dependent HA release (Fig. 1A). Data shown are means with 95% significance intervals.
