# Supplementary material
Source: PubMed Central journal article supplement (PMC3501122)
Supplement: Supp_Fig2.pdf [file Supp_Fig2.pdf]

| Source        | Sum Sq. | df | Mean Sq. | F      | Prob > F |
|---------------|---------|----|----------|--------|----------|
| HAase         | 186.7   | 1  | 186.7    | 6.68   | 1.23E-02 |
| Material      | 4565.2  | 1  | 4565.2   | 163.29 | 0.00E+00 |
| Time          | 65253   | 5  | 13050.6  | 466.81 | 0.00E+00 |
| Material*Time | 914.3   | 5  | 182.9    | 6.54   | 0.0001   |
| Error         | 1649.5  | 59 | 28       |        |          |
| Total         | 72568.6 | 71 |          |        |          |

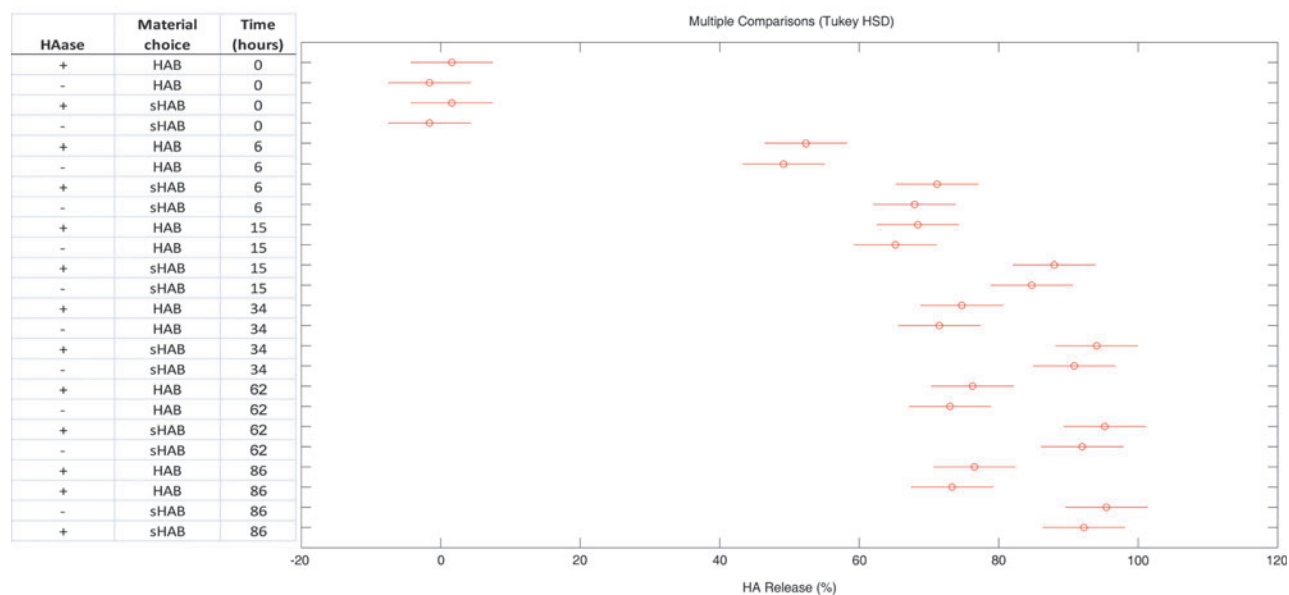

**SUPPLEMENTARY FIG. S2.** Statistical analysis of HA release. ANOVA  $p$ -values and multiple comparison test (Tukey HSD) of HABPep-dependent HA release with and without hyaluronidase (Fig. 1B). Data shown are means with 95% significance intervals.
