# Supplementary material
Source: PubMed Central journal article supplement (PMC3501122)
Supplement: Supp_Fig3.pdf [file Supp_Fig3.pdf]

| Source                | Sum Sq. | df  | Mean Sq. | F     | Prob > F |
|-----------------------|---------|-----|----------|-------|----------|
| HA concentration      | 25.725  | 3   | 8.57834  | 55.44 | 1.48E-20 |
| HA concentration*Time | 13.333  | 6   | 2.22217  | 14.36 | 1.73E-11 |
| Material*Time         | 7.7438  | 4   | 1.93594  | 12.51 | 3.62E-08 |
| Error                 | 14.2355 | 92  | 0.15473  |       |          |
| Total                 | 49.9199 | 105 |          |       |          |

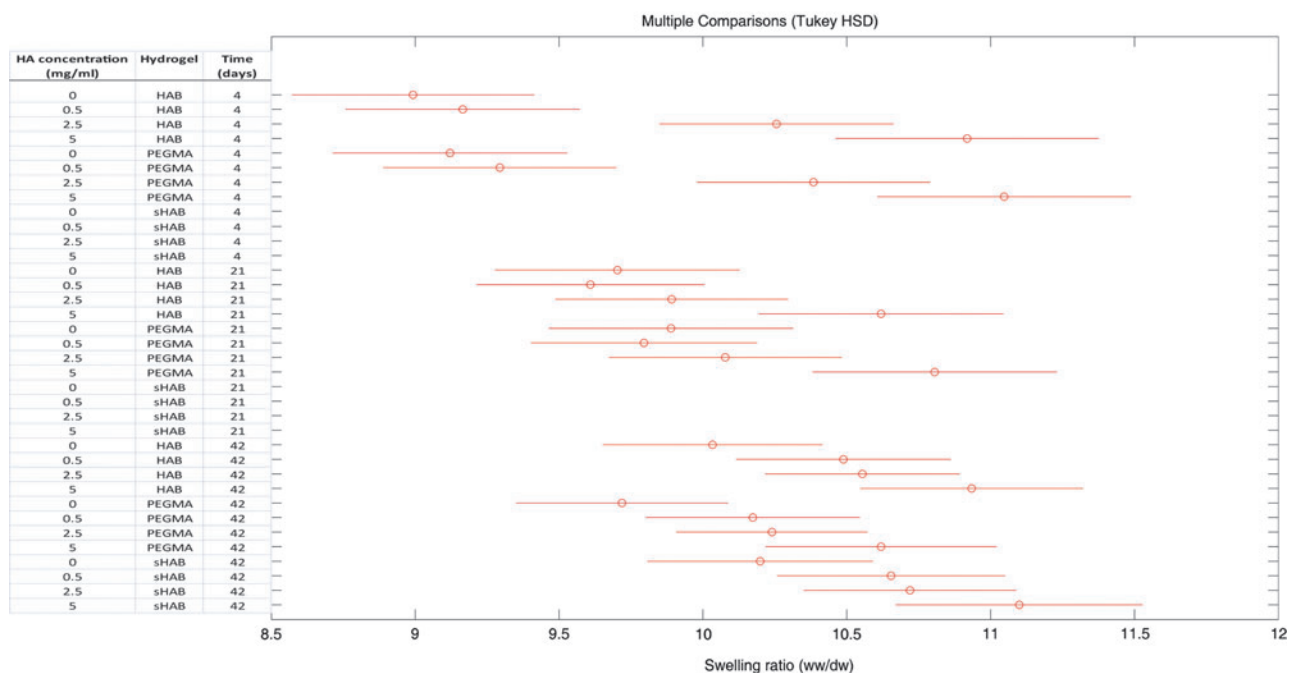

**SUPPLEMENTARY FIG. S3.** Statistical analysis of *in vitro* swelling ratio. ANOVA *p*-values and multiple comparison test (Tukey HSD) of *in vitro* swelling ratios of hydrogels with varying material choices and HA loading over 6 weeks (Fig. 2A). Data shown are means with 95% significance intervals.
