# Supplementary material
Source: PubMed Central journal article supplement (PMC3501122)
Supplement: Supp_Fig4.pdf [file Supp_Fig4.pdf]

| Source                    | Sum Sq. | df  | Mean Sq. | F     | Prob > F |
|---------------------------|---------|-----|----------|-------|----------|
| Material                  | 1.1776  | 2   | 0.5888   | 16.74 | 6.57E-07 |
| Time                      | 3.9095  | 2   | 1.95475  | 55.59 | 1.90E-16 |
| HA concentration*Material | 3.7854  | 6   | 0.6309   | 17.94 | 1.40E-13 |
| HA concentration*Time     | 1.4182  | 6   | 0.23637  | 6.72  | 6.62E-06 |
| Error                     | 3.1647  | 90  | 0.03516  |       |          |
| Total                     | 13.7212 | 106 |          |       |          |

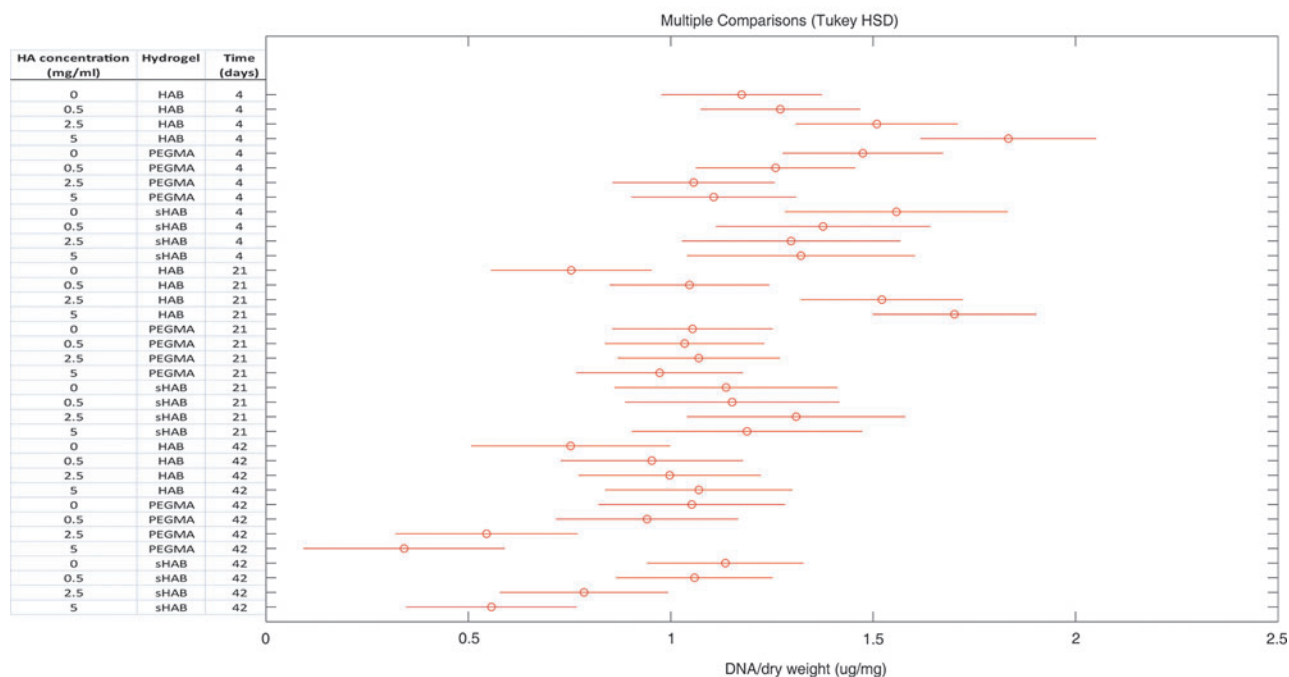

**SUPPLEMENTARY FIG. S4.** Statistical analysis of *in vitro* DNA content. ANOVA *p*-values and multiple comparison test (Tukey HSD) of *in vitro* DNA content of hydrogels with varying material choices and HA loading over 6 weeks (Fig. 2B). Data shown are means with 95% significance intervals.
