# Supplementary material
Source: PubMed Central journal article supplement (PMC3501122)
Supplement: Supp_Fig5.pdf [file Supp_Fig5.pdf]

| Source                    | Sum Sq.  | df  | Mean Sq. | F     | Prob > F |
|---------------------------|----------|-----|----------|-------|----------|
| HA concentration          | 19569.2  | 3   | 6523.1   | 3.24  | 2.61E-02 |
| Material                  | 116982.1 | 2   | 58491.1  | 29.01 | 0.00E+00 |
| Time                      | 1017770  | 2   | 508885.1 | 252.4 | 0.00E+00 |
| HA concentration*Material | 29613.1  | 6   | 4935.4   | 2.45  | 3.10E-02 |
| HA concentration*Time     | 84584.3  | 6   | 14097.4  | 6.99  | 0        |
| Error                     | 175411.1 | 87  | 2016.2   |       |          |
| Total                     | 1672840  | 106 |          |       |          |

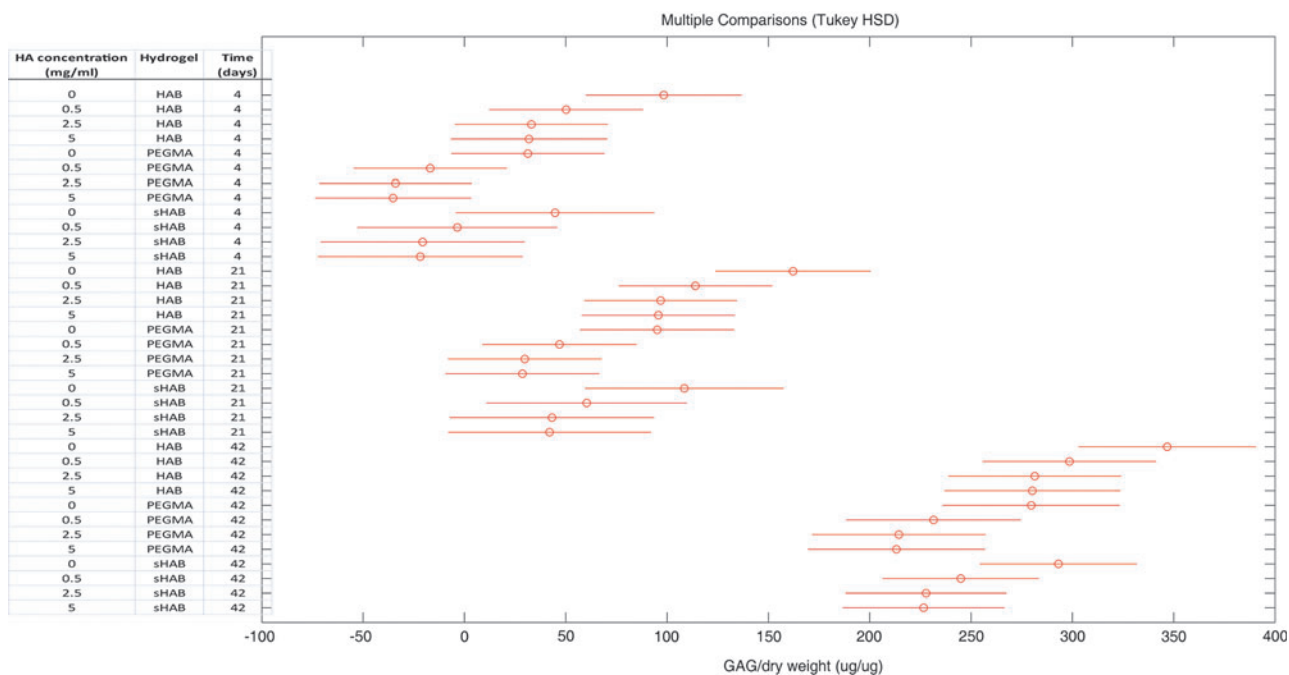

**SUPPLEMENTARY FIG. S5.** Statistical analysis of *in vitro* glycosaminoglycan (GAG) content. ANOVA *p*-values and multiple comparison test (Tukey HSD) of *in vitro* GAG content of hydrogels with varying material choices and HA loading over 6 weeks (Fig. 2C). Data shown are means with 95% significance intervals.
