# Supplementary material
Source: PubMed Central journal article supplement (PMC3501122)
Supplement: Supp_Fig6.pdf [file Supp_Fig6.pdf]

| Source                | Sum Sq. | df  | Mean Sq. | F      | Prob > F |
|-----------------------|---------|-----|----------|--------|----------|
| Material              | 1.0614  | 2   | 0.5307   | 7.3    | 1.10E-03 |
| Time                  | 29.9326 | 2   | 14.9663  | 205.83 | 0.00E+00 |
| HA concentration*Time | 1.5931  | 6   | 0.2655   | 3.65   | 2.60E-03 |
| Error                 | 6.9804  | 96  | 0.0727   |        |          |
| Total                 | 47.8485 | 106 |          |        |          |

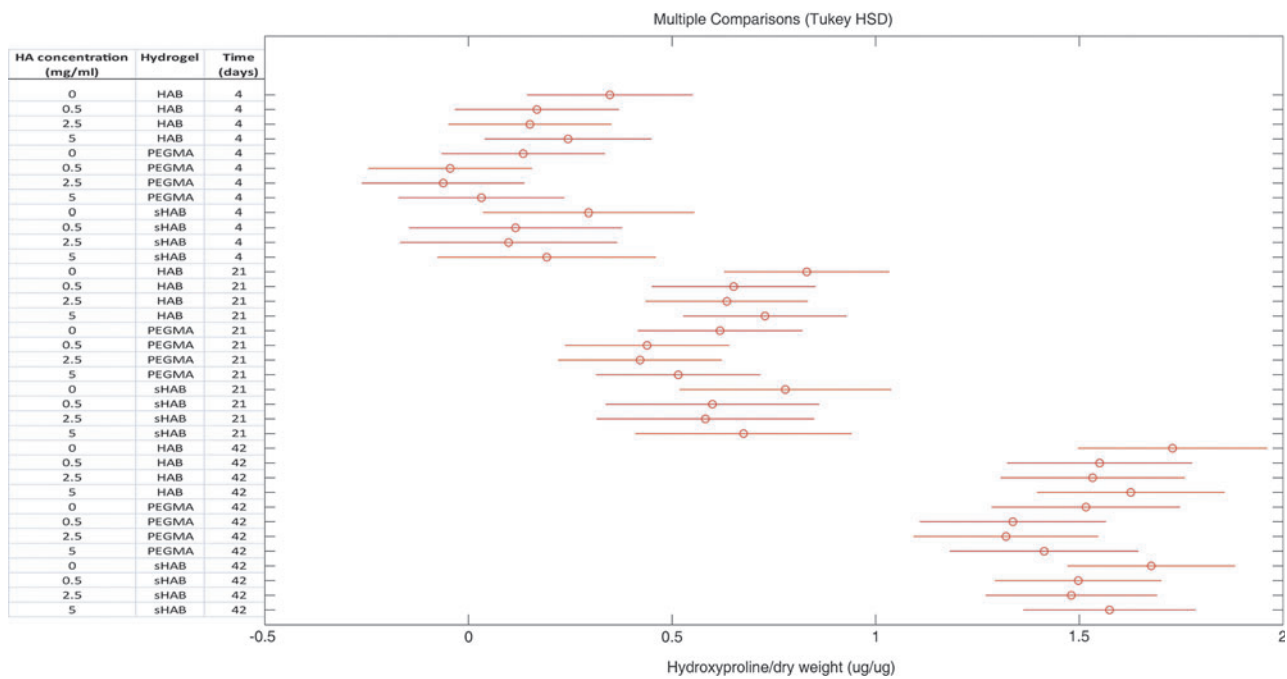

**SUPPLEMENTARY FIG. S6.** Statistical analysis of *in vitro* hydroxyproline content. ANOVA *p*-values and multiple comparison test (Tukey HSD) of *in vitro* hydroxyproline content of hydrogels with varying material choices and HA loading over 6 weeks (Fig. 2D). Data shown are means with 95% significance intervals.
