# Supplementary material
Source: PubMed Central journal article supplement (PMC3501122)
Supplement: Supp_Fig7.pdf [file Supp_Fig7.pdf]

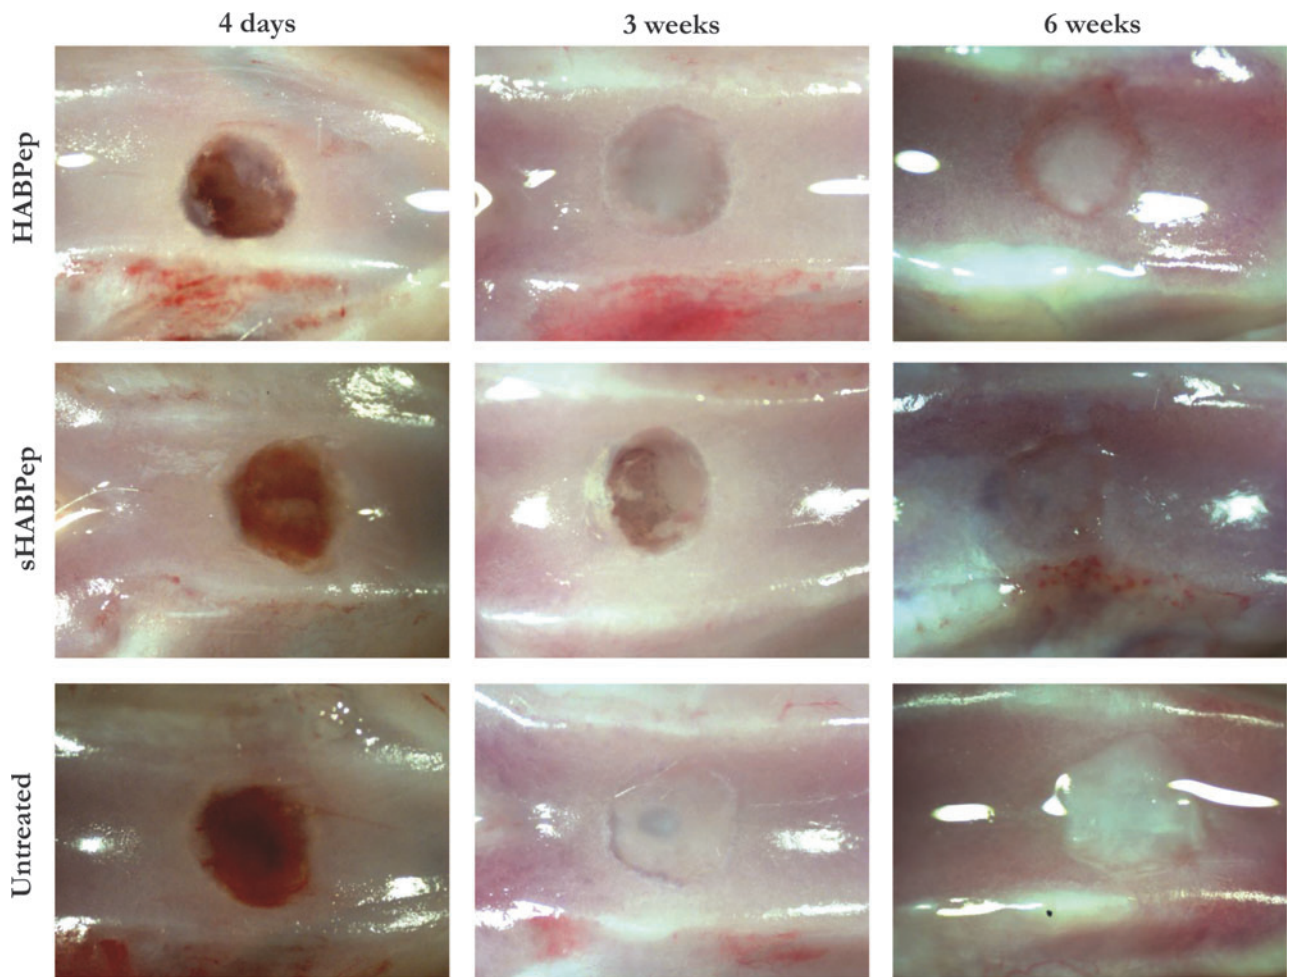

**SUPPLEMENTARY FIG. S7.** Gross images of representative cartilage defect repair. Cartilage defect repair over 6 weeks *in vivo* resulted in a repair tissue that varied between HA-interactive hydrogels (HABPep), scrambled peptide control hydrogels (sHABPep), and untreated defects.
