# Supplementary material
Source: PubMed Central journal article supplement (PMC3501122)
Supplement: Supp_Table1.pdf [file Supp_Table1.pdf]

SUPPLEMENTARY TABLE S1. PRIMER SEQUENCES FOR REAL TIME POLYMERASE CHAIN REACTION

| <i>Target</i>           |         | <i>Sequence</i>              |
|-------------------------|---------|------------------------------|
| <i>B-actin</i>          | Forward | 5'-GGCACCCAGCACAATGAA-3'     |
|                         | Reverse | 5'-GCTAACAGTCCGCCTAGAAGC-3'  |
| <i>Aggrecan</i>         | Forward | 5'-CACGATGCCTTTCCACCACGAC-3' |
|                         | Reverse | 5'-TGCGGGTCAACAGTGCCTATC-3'  |
| <i>Type I collagen</i>  | Forward | 5'-AGGGCCAAGACGAAGACATC-3'   |
|                         | Reverse | 5'-AGATCACGTCATCGCACACA-3'   |
| <i>Type II collagen</i> | Forward | 5'-GTGGAGCAGCAAGAGCAAGGA-3'  |
|                         | Reverse | 5'-CTTGCCCCACTTACCAGTGTG-3'  |
| <i>Sox-9</i>            | Forward | 5'-CGAGGAGGCCCGGAACAGA-3'    |
|                         | Reverse | 5'-GCACCTCGTCATGCCGGAG-3'    |
